# Supplementary material for: Lipid Profile in Multiple Sclerosis: Functional Capacity and Therapeutic Potential of Its Regulation after Intervention with Epigallocatechin Gallate and Coconut Oil
Source: MDPI journal article supplement (doi:10.3390/foods12203730), 2023-10-11
Supplement: s1 [file s1]

## *Supplementary Material*

**Table S1**

|            | <b>Linear regression coefficients: EDSS</b> |             |                           |          |            |
|------------|---------------------------------------------|-------------|---------------------------|----------|------------|
|            | <b>B</b>                                    | <b>ES B</b> | <b><math>\beta</math></b> | <b>t</b> | <b>sig</b> |
| <b>TC</b>  | -0,006                                      | 0,007       | -0,123                    | -0,835   | 0,409      |
|            | $R^2 = .211$ ; F model = 2.541, p = .055    |             |                           |          |            |
| <b>TG</b>  | 0,005                                       | 0,007       | 0,129                     | 0,713    | 0,481      |
| <b>LDL</b> | -0,017                                      | 0,012       | -0,242                    | -1,444   | 0,158      |
| <b>HDL</b> | 0,007                                       | 0,015       | 0,07                      | 0,462    | 0,647      |
|            | $R^2 = .171$ ; F model = 1.882, p = .112    |             |                           |          |            |

Model controlling for age, gender and BMI; SE B: standar error for B coefficient; TC: total cholesterol, TG: triglycerides, LDL: low density lipoprotein, HDL: high density lipoprotein
